# Supplementary material for: Sex-specific prognostic effect of CD66b-positive tumor-infiltrating neutrophils (TANs) in gastric and esophageal adenocarcinoma
Source: PubMed Central journal article supplement (PMC8502159; doi:10.1007/s10120-021-01197-2), 2021-05-19
Supplement: 10120_2021_1197_MOESM2_ESM.pdf [file 10120_2021_1197_MOESM2_ESM.pdf]

# **Sex specific prognostic effect of CD66b-positive Tumor-infiltrating neutrophils (TANs) in gastric and esophageal adenocarcinoma**

## **Gastric Cancer**

Alexander Quaas<sup>2#</sup>, Aylin Pamuk<sup>1#</sup>, Sebastian Klein<sup>2</sup>, Jennifer Quantius<sup>2</sup>, Jan Rehkaemper<sup>2</sup>, Atakan G. Barutcu<sup>1</sup>, Josef Rueschoff<sup>4</sup>, Thomas Zander<sup>3</sup>, Florian Gebauer<sup>1</sup>, Axel Hillmer<sup>2</sup>, Reinhard Buettner<sup>2</sup>, Wolfgang Schroeder<sup>1</sup>, Christiane J. Bruns<sup>1</sup>, Heike Löser<sup>2</sup>, Birgid Schoemig-Markiefka<sup>2#</sup> and Hakan Alakus<sup>1#</sup>

1 Department of General, Visceral, Cancer and Transplantation Surgery, University Hospital Cologne, Cologne (Germany)

2 Institute of Pathology, University Hospital Cologne, Cologne (Germany)

3 University of Cologne, Department I of Internal Medicine, Center for Integrated Oncology Aachen Bonn Cologne Duesseldorf; Gastrointestinal Cancer Group Cologne GCGC

4 Institute of Pathology, Nordhessen and Targos Molecular Pathology GmbH, Kassel, (Germany)

# contributed equally to the work

## **Correspondence to**

PD Dr med Hakan Alakus

Department of General, Visceral, Cancer and Transplantation Surgery

University Hospital Cologne

Kerpener Str. 62

50937 Cologne, Germany

E-Mail: hakan.alakus@uk-koeln.de

Phone: +49 0221 478-4803

Fax: +49 0221 478-6258

## Online Resource 2 Correlation co-efficient in TAN-rich gastric carcinoma

|              |                              |                          | TAN rich (>50.<br>percentiles) | (y)pN-Category |
|--------------|------------------------------|--------------------------|--------------------------------|----------------|
| Spearman-Rho | TAN rich (> 50. percentiles) | correlation co-efficient | 1,000                          | -,141**        |
|              |                              | Sig. (2-sided)           | .                              | ,003           |
|              |                              | N                        | 556                            | 439            |
|              | (y)pN-Category               | correlation co-efficient | -,141**                        | 1,000          |
|              |                              | Sig. (2-sided)           | ,003                           | .              |
|              |                              | N                        | 439                            | 439            |

\*\* . The correlation is significant at the 0,01 level (two-sided).
